# Supplementary material for: A stationary phase with a positively charged surface allows for minimizing formic acid concentration in the mobile phase, enhancing electrospray ionization in LC-MS proteomic experiments
Source: Royal Society of Chemistry journal article supplement (doi:10.1039/d3an01508d), 2023-01-01

## Supplementary Information

### A stationary phase with a positively charged surface allows for minimizing formic acid concentration in the mobile phase, enhancing electrospray ionization in LC-MS proteomic experiments

Siddharth Jadeja,<sup>1</sup> Rudolf Kupčík<sup>2</sup>, Ivo Fabrik<sup>2</sup>, Hana Sklenářová<sup>1</sup> and Juraj Lenčo<sup>1\*</sup>

<sup>1</sup> Department of Analytical Chemistry, Faculty of Pharmacy, Charles University in Prague, Heyrovského 1203/8, 500 05 Hradec Králové, Czech Republic

<sup>2</sup> Biomedical Research Center, University Hospital Hradec Králové, Sokolská 581, 500 05 Hradec Králové, Czech Republic

\*Corresponding Author: E-mail: lenco@faf.cuni.cz, Phone: +420 495 067 381.

#### Table of contents

|                                                                                                                                                                                                                               |   |
|-------------------------------------------------------------------------------------------------------------------------------------------------------------------------------------------------------------------------------|---|
| Table S1. MS1 and DDA settings for all experiments. ....                                                                                                                                                                      | 2 |
| Table S2. pH measured at different concentrations of formic acid. ....                                                                                                                                                        | 3 |
| Table S3. Retention time of iRT and Alberta peptides when separated using mobile phase acidified varied concentrations of formic acid on BEH and CSH columns. ....                                                            | 4 |
| Table S4. USP symmetry factor of iRT and Alberta peptide peaks when separated using mobile phase acidified varied concentrations of formic acid on BEH and CSH columns ....                                                   | 5 |
| Table S5. Peak width ( $w_{50\%}$ ) of iRT and Alberta peptide peaks when separated using mobile phase acidified with varied concentrations of formic acid on BEH and CSH columns ....                                        | 6 |
| Figure S1. Base peak (BP) chromatogram of five iRT peptides separated on CSH column using mobile phase acidified with 0.10% and 0.01% formic acid. ....                                                                       | 7 |
| Figure S2. Intensity distribution for peptides identified from the tryptic digest of Jurkat cells exclusively in low formic acid concentration versus those identified in both conditions.....                                | 8 |
| Figure S3. Percentage of peptides with artificial modifications identified against total identified peptides containing that particular amino acid when using 0.10% and 0.01% of formic acid as mobile phase acidifiers ..... | 9 |

Table S1. MS1 and DDA settings for all experiments.

|                                                                                                                   |                                     |                       |
|-------------------------------------------------------------------------------------------------------------------|-------------------------------------|-----------------------|
| Analysis of iRT and Alberta peptides                                                                              |                                     |                       |
| MS1 settings                                                                                                      | Resolution at 200 m/z               | 60,000                |
|                                                                                                                   | AGC target                          | $1 \times 10^6$       |
|                                                                                                                   | Maximum injection time              | 60 ms                 |
|                                                                                                                   | Scan range                          | 300 to 1500 m/z       |
| Analysis of trastuzumab digest with a reduced formic acid concentration in the mobile phase                       |                                     |                       |
| MS1 settings                                                                                                      | Resolution at 200 m/z               | 60,000                |
|                                                                                                                   | AGC target                          | $1 \times 10^6$       |
|                                                                                                                   | Maximum injection time              | 60 ms                 |
|                                                                                                                   | Scan range                          | 300 to 1500 m/z       |
| DDA and MS2 settings                                                                                              | Charge states of precursors         | $\geq 2$ and $\leq 5$ |
|                                                                                                                   | Isolation window                    | 2.5 m/z               |
|                                                                                                                   | Normalized collision energy for HCD | 27                    |
|                                                                                                                   | Resolution at 200 m/z               | 15 000                |
|                                                                                                                   | AGC target                          | $2 \times 10^5$       |
|                                                                                                                   | Maximum injection time              | 100 ms                |
|                                                                                                                   | Exclusion time                      | 3 s                   |
| Max. number of precursors                                                                                         | 2                                   |                       |
| Effect of formic acid concentration in analysis of digest of bacterium & in analysis of a complex eukaryotic cell |                                     |                       |
| MS1 settings                                                                                                      | Resolution at 200 m/z               | 60,000                |
|                                                                                                                   | AGC target                          | $3 \times 10^6$       |
|                                                                                                                   | Maximum ion time                    | 110 ms                |
|                                                                                                                   | Scan range                          | 350 to 1500 m/z       |
| DDA and MS2 settings                                                                                              | Charge states of precursors         | $\geq 2$ and $\leq 5$ |
|                                                                                                                   | Isolation window                    | 1.8 m/z               |
|                                                                                                                   | Normalized collision energy for HCD | 27                    |
|                                                                                                                   | Resolution at 200 m/z               | 15 000                |
|                                                                                                                   | AGC target                          | $2 \times 10^5$       |
|                                                                                                                   | Maximum injection time              | 50 ms                 |
|                                                                                                                   | Exclusion time                      | 20 s                  |
| Max. number of precursors                                                                                         | 10                                  |                       |
| Effect of formic acid concentration in analysis of a complex HeLa cells lysate digest using nano-flow LC-MS       |                                     |                       |
| MS1 settings                                                                                                      | Resolution at 200 m/z               | 70,000                |
|                                                                                                                   | AGC target                          | $3 \times 10^6$       |
|                                                                                                                   | Maximum ion time                    | 100 ms                |
|                                                                                                                   | Scan range                          | 350 to 1600 m/z       |
| DDA and MS2 settings                                                                                              | Charge states of precursors         | $\geq 2$ and $\leq 7$ |
|                                                                                                                   | Isolation window                    | 2.0 m/z               |
|                                                                                                                   | Normalized collision energy for HCD | 28                    |
|                                                                                                                   | Resolution at 200 m/z               | 17,500                |
|                                                                                                                   | AGC target                          | $1.0 \times 10^5$     |
|                                                                                                                   | Maximum ion time                    | 60 ms                 |
|                                                                                                                   | Exclusion time                      | 20 s                  |
| Max. number of precursors                                                                                         | 10                                  |                       |

Table S2. pH measured at different concentrations of formic acid.

| Concentration of formic acid<br>in the mobile phase (%) | Measured pH of solution |
|---------------------------------------------------------|-------------------------|
| 0.10                                                    | 2.63                    |
| 0.08                                                    | 2.70                    |
| 0.06                                                    | 2.74                    |
| 0.04                                                    | 2.84                    |
| 0.02                                                    | 3.00                    |
| 0.01                                                    | 3.20                    |

**Table S3. Retention time of iRT and Alberta peptides when separated using mobile phase acidified with varied concentrations of formic acid on BEH and CSH columns.**

| Retention time (min) of iRT peptides when separated on CSH column     |                      |      |      |                      |      |      |                      |      |      |                      |      |      |      |      |      |
|-----------------------------------------------------------------------|----------------------|------|------|----------------------|------|------|----------------------|------|------|----------------------|------|------|------|------|------|
| C <sub>(formic ac.)</sub> %                                           | GAG                  |      |      | YIL                  |      |      | TPV                  |      |      | ADV                  |      |      | GTF  |      |      |
| 0.10                                                                  | 4.96                 | 4.97 | 4.97 | 5.71                 | 5.71 | 5.71 | 6.16                 | 6.16 | 6.17 | 7.06                 | 7.05 | 7.07 | 8.69 | 8.69 | 8.69 |
| 0.08                                                                  | 4.98                 | 4.97 | 4.97 | 5.73                 | 5.72 | 5.72 | 6.16                 | 6.16 | 6.16 | 7.08                 | 7.08 | 7.08 | 8.68 | 8.66 | 8.69 |
| 0.06                                                                  | 4.97                 | 4.93 | 4.97 | 5.72                 | 5.7  | 5.72 | 6.15                 | 6.12 | 6.15 | 7.11                 | 7.08 | 7.10 | 8.67 | 8.65 | 8.67 |
| 0.04                                                                  | 4.97                 | 4.96 | 4.97 | 5.74                 | 5.72 | 5.73 | 6.14                 | 6.15 | 6.14 | 7.16                 | 7.16 | 7.16 | 8.66 | 8.66 | 8.66 |
| 0.02                                                                  | 4.99                 | 5.00 | 5.00 | 5.77                 | 5.78 | 5.78 | 6.15                 | 6.16 | 6.16 | 7.31                 | 7.30 | 7.31 | 8.68 | 8.68 | 8.69 |
| 0.01                                                                  | 5.06                 | 5.06 | 5.06 | 5.85                 | 5.85 | 5.85 | 6.20                 | 6.20 | 6.20 | 7.49                 | 7.47 | 7.48 | 8.76 | 8.76 | 8.76 |
| Retention time (min) of iRT peptides when separated on BEH column     |                      |      |      |                      |      |      |                      |      |      |                      |      |      |      |      |      |
| C <sub>(formic ac.)</sub> %                                           | GAG                  |      |      | YIL                  |      |      | TPV                  |      |      | ADV                  |      |      | GTF  |      |      |
| 0.10                                                                  | 5.71                 | 5.71 | 5.72 | 6.74                 | 6.74 | 6.73 | 6.99                 | 6.99 | 6.99 | 7.81                 | 7.81 | 7.8  | 9.78 | 9.78 | 9.78 |
| 0.08                                                                  | 5.69                 | 5.70 | 5.69 | 6.71                 | 6.70 | 6.70 | 6.96                 | 6.95 | 6.95 | 7.80                 | 7.78 | 7.78 | 9.75 | 9.75 | 9.75 |
| 0.06                                                                  | 5.66                 | 5.67 | 5.66 | 6.68                 | 6.67 | 6.67 | 6.93                 | 6.91 | 6.92 | 7.76                 | 7.75 | 7.76 | 9.67 | 9.68 | 9.68 |
| 0.04                                                                  | 5.61                 | 5.63 | 5.62 | 6.63                 | 6.63 | 6.63 | 6.86                 | 6.86 | 6.87 | 7.73                 | 7.73 | 7.73 | 9.61 | 9.6  | 9.61 |
| 0.02                                                                  | 5.56                 | 5.56 | 5.57 | 6.59                 | 6.57 | 6.58 | 6.80                 | 6.79 | 6.79 | 7.73                 | 7.72 | 7.73 | 9.51 | 9.51 | 9.51 |
| 0.01                                                                  | 5.52                 | 5.50 | 5.51 | 6.53                 | 6.53 | 6.53 | 6.72                 | 6.72 | 6.72 | 7.72                 | 7.72 | 7.71 | 9.41 | 9.41 | 9.41 |
| Retention time (min) of Alberta peptides when separated on CSH column |                      |      |      |                      |      |      |                      |      |      |                      |      |      |      |      |      |
| C <sub>(formic ac.)</sub> %                                           | ac-GGG <sup>1+</sup> |      |      | ac-KYG <sup>2+</sup> |      |      | ac-GGA <sup>3+</sup> |      |      | ac-KYA <sup>4+</sup> |      |      |      |      |      |
| 0.10                                                                  | 5.92                 | 5.92 | 5.91 | 5.53                 | 5.53 | 5.53 | 5.45                 | 5.44 | 5.43 | 5.68                 | 5.67 | 5.67 |      |      |      |
| 0.08                                                                  | 5.90                 | 5.91 | 5.91 | 5.5                  | 5.51 | 5.50 | 5.42                 | 5.42 | 5.42 | 5.64                 | 5.65 | 5.65 |      |      |      |
| 0.06                                                                  | 5.91                 | 5.90 | 5.90 | 5.49                 | 5.5  | 5.49 | 5.39                 | 5.39 | 5.38 | 5.6                  | 5.61 | 5.6  |      |      |      |
| 0.04                                                                  | 5.90                 | 5.90 | 5.90 | 5.47                 | 5.48 | 5.47 | 5.36                 | 5.36 | 5.36 | 5.56                 | 5.57 | 5.57 |      |      |      |
| 0.02                                                                  | 5.92                 | 5.92 | 5.93 | 5.46                 | 5.46 | 5.46 | 5.32                 | 5.32 | 5.34 | 5.51                 | 5.51 | 5.52 |      |      |      |
| 0.01                                                                  | 5.98                 | 5.97 | 5.97 | 5.46                 | 5.47 | 5.47 | 5.30                 | 5.30 | 5.30 | 5.48                 | 5.48 | 5.48 |      |      |      |
| Retention time (min) of Alberta peptides when separated on BEH column |                      |      |      |                      |      |      |                      |      |      |                      |      |      |      |      |      |
| C <sub>(formic ac.)</sub> %                                           | ac-GGG <sup>1+</sup> |      |      | ac-KYG <sup>2+</sup> |      |      | ac-GGA <sup>3+</sup> |      |      | ac-KYA <sup>4+</sup> |      |      |      |      |      |
| 0.10                                                                  | 6.54                 | 6.54 | 6.54 | 6.46                 | 6.47 | 6.46 | 6.53                 | 6.54 | 6.54 | 6.87                 | 6.88 | 6.87 |      |      |      |
| 0.08                                                                  | 6.52                 | 6.52 | 6.52 | 6.43                 | 6.43 | 6.43 | 6.49                 | 6.49 | 6.49 | 6.82                 | 6.81 | 6.82 |      |      |      |
| 0.06                                                                  | 6.49                 | 6.48 | 6.49 | 6.39                 | 6.38 | 6.38 | 6.42                 | 6.43 | 6.42 | 6.74                 | 6.74 | 6.73 |      |      |      |
| 0.04                                                                  | 6.44                 | 6.44 | 6.44 | 6.31                 | 6.32 | 6.31 | 6.35                 | 6.35 | 6.35 | 6.65                 | 6.64 | 6.65 |      |      |      |
| 0.02                                                                  | 6.37                 | 6.36 | 6.37 | 6.21                 | 6.21 | 6.21 | 6.2                  | 6.2  | 6.21 | 6.47                 | 6.47 | 6.49 |      |      |      |
| 0.01                                                                  | 6.30                 | 6.30 | 6.30 | 6.11                 | 6.11 | 6.11 | 6.07                 | 6.07 | 6.08 | 6.31                 | 6.32 | 6.32 |      |      |      |

**Table S4. USP symmetry factor of iRT and Alberta peptide peaks when separated using mobile phase acidified with varied concentrations of formic acid on BEH and CSH columns.**

| USP symmetry factor of iRT peptides when separated on the CSH column     |                      |       |       |                      |       |       |                      |       |       |                      |       |       |       |       |       |
|--------------------------------------------------------------------------|----------------------|-------|-------|----------------------|-------|-------|----------------------|-------|-------|----------------------|-------|-------|-------|-------|-------|
| C <sub>(formic ac.)</sub> %                                              | GAG                  |       |       | YIL                  |       |       | TPV                  |       |       | ADV                  |       |       | GTF   |       |       |
| 0.10                                                                     | 1.200                | 1.180 | 1.190 | 1.200                | 1.215 | 1.218 | 1.189                | 1.208 | 1.186 | 1.170                | 1.182 | 1.170 | 1.056 | 1.049 | 1.060 |
| 0.08                                                                     | 1.230                | 1.094 | 1.136 | 1.190                | 1.173 | 1.191 | 1.168                | 1.184 | 1.184 | 1.148                | 1.168 | 1.168 | 1.034 | 1.034 | 1.046 |
| 0.06                                                                     | 1.055                | 1.054 | 1.067 | 1.157                | 1.186 | 1.190 | 1.150                | 1.150 | 1.151 | 1.150                | 1.149 | 1.169 | 1.019 | 1.028 | 1.033 |
| 0.04                                                                     | 1.031                | 1.035 | 1.041 | 1.173                | 1.141 | 1.137 | 1.155                | 1.147 | 1.162 | 1.144                | 1.117 | 1.125 | 1.023 | 1.033 | 1.004 |
| 0.02                                                                     | 0.993                | 0.986 | 0.993 | 1.103                | 1.073 | 1.093 | 1.096                | 1.116 | 1.113 | 1.125                | 1.117 | 1.098 | 1.000 | 1.023 | 1.004 |
| 0.01                                                                     | 0.990                | 1.000 | 0.980 | 1.045                | 1.030 | 1.040 | 1.058                | 1.055 | 1.053 | 1.166                | 1.149 | 1.149 | 0.993 | 0.995 | 0.981 |
| USP symmetry factor of iRT peptides when separated on the BEH column     |                      |       |       |                      |       |       |                      |       |       |                      |       |       |       |       |       |
| C <sub>(formic ac.)</sub> %                                              | GAG                  |       |       | YIL                  |       |       | TPV                  |       |       | ADV                  |       |       | GTF   |       |       |
| 0.10                                                                     | 1.320                | 1.330 | 1.290 | 1.509                | 1.472 | 1.509 | 1.415                | 1.420 | 1.420 | 1.280                | 1.310 | 1.298 | 1.302 | 1.246 | 1.280 |
| 0.08                                                                     | 1.338                | 1.309 | 1.301 | 1.472                | 1.472 | 1.518 | 1.398                | 1.381 | 1.379 | 1.312                | 1.312 | 1.298 | 1.290 | 1.285 | 1.290 |
| 0.06                                                                     | 1.300                | 1.322 | 1.307 | 1.470                | 1.490 | 1.482 | 1.410                | 1.415 | 1.433 | 1.357                | 1.348 | 1.342 | 1.220 | 1.242 | 1.269 |
| 0.04                                                                     | 1.320                | 1.310 | 1.310 | 1.482                | 1.490 | 1.473 | 1.416                | 1.398 | 1.398 | 1.401                | 1.410 | 1.403 | 1.335 | 1.320 | 1.310 |
| 0.02                                                                     | 1.388                | 1.365 | 1.359 | 1.509                | 1.518 | 1.473 | 1.390                | 1.416 | 1.372 | 2.534                | 2.389 | 2.412 | 1.230 | 1.257 | 1.250 |
| 0.01                                                                     | 1.320                | 1.360 | 1.320 | 1.280                | 1.310 | 1.280 | 1.350                | 1.390 | 1.380 | 2.290                | 2.320 | 2.330 | 1.180 | 1.170 | 1.200 |
| USP symmetry factor of Alberta peptides when separated on the CSH column |                      |       |       |                      |       |       |                      |       |       |                      |       |       |       |       |       |
| C <sub>(formic ac.)</sub> %                                              | ac-GGG <sup>1+</sup> |       |       | ac-KYG <sup>2+</sup> |       |       | ac-GGA <sup>3+</sup> |       |       | ac-KYA <sup>4+</sup> |       |       |       |       |       |
| 0.10                                                                     | 1.230                | 1.250 | 1.240 | 1.280                | 1.260 | 1.280 | 1.190                | 1.230 | 1.250 | 1.230                | 1.220 | 1.220 |       |       |       |
| 0.08                                                                     | 1.257                | 1.253 | 1.253 | 1.260                | 1.250 | 1.268 | 1.188                | 1.250 | 1.200 | 1.230                | 1.240 | 1.260 |       |       |       |
| 0.06                                                                     | 1.231                | 1.220 | 1.220 | 1.260                | 1.239 | 1.232 | 1.238                | 1.227 | 1.227 | 1.210                | 1.220 | 1.240 |       |       |       |
| 0.04                                                                     | 1.220                | 1.240 | 1.240 | 1.219                | 1.256 | 1.253 | 1.230                | 1.200 | 1.191 | 1.250                | 1.220 | 1.220 |       |       |       |
| 0.02                                                                     | 1.148                | 1.197 | 1.190 | 1.189                | 1.208 | 1.240 | 1.160                | 1.160 | 1.140 | 1.197                | 1.230 | 1.210 |       |       |       |
| 0.01                                                                     | 1.150                | 1.130 | 1.160 | 1.180                | 1.150 | 1.190 | 1.080                | 1.100 | 1.080 | 1.200                | 1.200 | 1.200 |       |       |       |
| USP symmetry factor of Alberta peptides when separated on the BEH column |                      |       |       |                      |       |       |                      |       |       |                      |       |       |       |       |       |
| C <sub>(formic ac.)</sub> %                                              | ac-GGG <sup>1+</sup> |       |       | ac-KYG <sup>2+</sup> |       |       | ac-GGA <sup>3+</sup> |       |       | ac-KYA <sup>4+</sup> |       |       |       |       |       |
| 0.1                                                                      | 1.381                | 1.406 | 1.372 | 1.528                | 1.446 | 1.490 | 1.650                | 1.550 | 1.630 | 1.651                | 1.620 | 1.640 |       |       |       |
| 0.08                                                                     | 1.388                | 1.432 | 1.433 | 1.518                | 1.518 | 1.509 | 1.629                | 1.639 | 1.622 | 1.568                | 1.605 | 1.633 |       |       |       |
| 0.06                                                                     | 1.407                | 1.416 | 1.415 | 1.500                | 1.509 | 1.490 | 1.672                | 1.634 | 1.680 | 1.631                | 1.680 | 1.675 |       |       |       |
| 0.04                                                                     | 1.410                | 1.460 | 1.450 | 1.563                | 1.500 | 1.570 | 1.693                | 1.666 | 1.704 | 1.680                | 1.670 | 1.660 |       |       |       |
| 0.02                                                                     | 1.280                | 1.294 | 1.280 | 1.508                | 1.525 | 1.491 | 1.805                | 1.828 | 1.833 | 1.758                | 1.738 | 1.741 |       |       |       |
| 0.01                                                                     | 1.280                | 1.290 | 1.280 | 1.500                | 1.520 | 1.490 | 1.800                | 1.820 | 1.830 | 1.750                | 1.730 | 1.740 |       |       |       |

Table S5. Peak width ( $w_{50\%}$ ) of iRT and Alberta peptide peaks when separated using mobile phase acidified with varied concentrations of formic acid on BEH and CSH columns.

| Peak width ( $w_{50\%}$ , s) of iRT peptides when separated on CSH column     |                      |      |      |                      |      |      |                      |      |      |                      |      |      |      |      |      |
|-------------------------------------------------------------------------------|----------------------|------|------|----------------------|------|------|----------------------|------|------|----------------------|------|------|------|------|------|
| $C_{(\text{formic ac.})}$ %                                                   | GAG                  |      |      | YIL                  |      |      | TPV                  |      |      | ADV                  |      |      | GTF  |      |      |
| 0.10                                                                          | 1.56                 | 1.56 | 1.56 | 1.50                 | 1.50 | 1.50 | 1.50                 | 1.44 | 1.50 | 1.62                 | 1.62 | 1.56 | 1.56 | 1.56 | 1.56 |
| 0.08                                                                          | 1.62                 | 1.56 | 1.56 | 1.50                 | 1.50 | 1.50 | 1.50                 | 1.44 | 1.50 | 1.56                 | 1.62 | 1.62 | 1.62 | 1.56 | 1.56 |
| 0.06                                                                          | 1.56                 | 1.56 | 1.56 | 1.50                 | 1.50 | 1.50 | 1.50                 | 1.50 | 1.50 | 1.62                 | 1.62 | 1.62 | 1.56 | 1.56 | 1.56 |
| 0.04                                                                          | 1.56                 | 1.62 | 1.62 | 1.50                 | 1.50 | 1.50 | 1.50                 | 1.50 | 1.50 | 1.62                 | 1.62 | 1.62 | 1.56 | 1.62 | 1.62 |
| 0.02                                                                          | 1.68                 | 1.68 | 1.68 | 1.56                 | 1.56 | 1.62 | 1.56                 | 1.56 | 1.56 | 1.74                 | 1.74 | 1.68 | 1.68 | 1.68 | 1.68 |
| 0.01                                                                          | 1.74                 | 1.74 | 1.74 | 1.74                 | 1.68 | 1.68 | 1.62                 | 1.62 | 1.62 | 1.80                 | 1.80 | 1.80 | 1.74 | 1.74 | 1.74 |
| Peak width ( $w_{50\%}$ , s) of iRT peptides when separated on BEH column     |                      |      |      |                      |      |      |                      |      |      |                      |      |      |      |      |      |
| $C_{(\text{formic ac.})}$ %                                                   | GAG                  |      |      | YIL                  |      |      | TPV                  |      |      | ADV                  |      |      | GTF  |      |      |
| 0.10                                                                          | 2.22                 | 2.22 | 2.22 | 2.22                 | 2.22 | 2.16 | 2.04                 | 2.04 | 2.04 | 1.92                 | 1.92 | 1.92 | 2.22 | 2.22 | 2.22 |
| 0.08                                                                          | 2.22                 | 2.22 | 2.27 | 2.22                 | 2.22 | 2.22 | 2.10                 | 2.10 | 2.10 | 1.92                 | 1.92 | 1.98 | 2.22 | 2.22 | 2.27 |
| 0.06                                                                          | 2.28                 | 2.22 | 2.28 | 2.22                 | 2.22 | 2.22 | 2.04                 | 2.10 | 2.10 | 1.92                 | 1.92 | 1.98 | 2.28 | 2.22 | 2.28 |
| 0.04                                                                          | 2.28                 | 2.28 | 2.28 | 2.22                 | 2.22 | 2.22 | 2.10                 | 2.10 | 2.10 | 1.98                 | 1.92 | 1.98 | 2.28 | 2.28 | 2.28 |
| 0.02                                                                          | 2.34                 | 2.34 | 2.34 | 2.28                 | 2.28 | 2.22 | 2.10                 | 2.10 | 2.10 | 2.40                 | 2.40 | 2.34 | 2.34 | 2.34 | 2.34 |
| 0.01                                                                          | 2.52                 | 2.46 | 2.52 | 2.22                 | 2.22 | 2.22 | 2.16                 | 2.16 | 2.16 | 2.28                 | 2.28 | 2.28 | 2.52 | 2.46 | 2.52 |
| Peak width ( $w_{50\%}$ , s) of Alberta peptides when separated on CSH column |                      |      |      |                      |      |      |                      |      |      |                      |      |      |      |      |      |
| $C_{(\text{formic ac.})}$ %                                                   | ac-GGG <sup>1+</sup> |      |      | ac-KYG <sup>2+</sup> |      |      | ac-GGA <sup>3+</sup> |      |      | ac-KYA <sup>4+</sup> |      |      |      |      |      |
| 0.10                                                                          | 1.50                 | 1.50 | 1.50 | 1.44                 | 1.44 | 1.44 | 1.44                 | 1.44 | 1.44 | 1.44                 | 1.44 | 1.44 | 1.44 | 1.44 | 1.44 |
| 0.08                                                                          | 1.50                 | 1.38 | 1.50 | 1.44                 | 1.44 | 1.44 | 1.44                 | 1.44 | 1.44 | 1.44                 | 1.44 | 1.44 | 1.44 | 1.44 | 1.44 |
| 0.06                                                                          | 1.50                 | 1.50 | 1.50 | 1.44                 | 1.44 | 1.44 | 1.44                 | 1.44 | 1.44 | 1.44                 | 1.44 | 1.44 | 1.44 | 1.44 | 1.44 |
| 0.04                                                                          | 1.50                 | 1.50 | 1.50 | 1.44                 | 1.44 | 1.44 | 1.44                 | 1.44 | 1.44 | 1.44                 | 1.44 | 1.44 | 1.44 | 1.44 | 1.44 |
| 0.02                                                                          | 1.50                 | 1.50 | 1.50 | 1.50                 | 1.50 | 1.50 | 1.50                 | 1.50 | 1.50 | 1.44                 | 1.44 | 1.44 | 1.44 | 1.44 | 1.44 |
| 0.01                                                                          | 1.56                 | 1.56 | 1.56 | 1.56                 | 1.56 | 1.56 | 1.56                 | 1.56 | 1.56 | 1.56                 | 1.56 | 1.50 | 1.50 | 1.50 | 1.50 |
| Peak width ( $w_{50\%}$ , s) of Alberta peptides when separated on BEH column |                      |      |      |                      |      |      |                      |      |      |                      |      |      |      |      |      |
| $C_{(\text{formic ac.})}$ %                                                   | ac-GGG <sup>1+</sup> |      |      | ac-KYG <sup>2+</sup> |      |      | ac-GGA <sup>3+</sup> |      |      | ac-KYA <sup>4+</sup> |      |      |      |      |      |
| 0.1                                                                           | 2.04                 | 2.04 | 2.10 | 2.28                 | 2.34 | 2.34 | 2.82                 | 2.82 | 2.76 | 2.58                 | 2.58 | 2.52 |      |      |      |
| 0.08                                                                          | 2.10                 | 2.10 | 2.10 | 2.34                 | 2.34 | 2.34 | 2.94                 | 2.88 | 2.88 | 2.58                 | 2.58 | 2.58 |      |      |      |
| 0.06                                                                          | 2.10                 | 1.50 | 2.10 | 2.40                 | 2.40 | 2.40 | 3.00                 | 3.00 | 2.94 | 2.64                 | 2.70 | 2.70 |      |      |      |
| 0.04                                                                          | 2.10                 | 2.16 | 2.16 | 2.46                 | 2.47 | 2.46 | 3.00                 | 3.00 | 3.00 | 2.76                 | 2.70 | 2.76 |      |      |      |
| 0.02                                                                          | 2.04                 | 1.98 | 2.04 | 2.88                 | 2.82 | 2.82 | 3.72                 | 3.84 | 3.72 | 3.24                 | 3.30 | 3.24 |      |      |      |
| 0.01                                                                          | 2.04                 | 1.98 | 2.04 | 2.88                 | 2.82 | 2.82 | 3.72                 | 3.84 | 3.72 | 3.24                 | 3.30 | 3.24 |      |      |      |

Figure S1. Base peak (BP) chromatogram of five iRT peptides separated on CSH column using mobile phase acidified with 0.10% (A) and 0.01% (B) of formic acid. Base peak chromatogram of four Alberta peptides separated on CSH column using mobile phase acidified with 0.10% (C) and 0.01% (D) of formic acid.

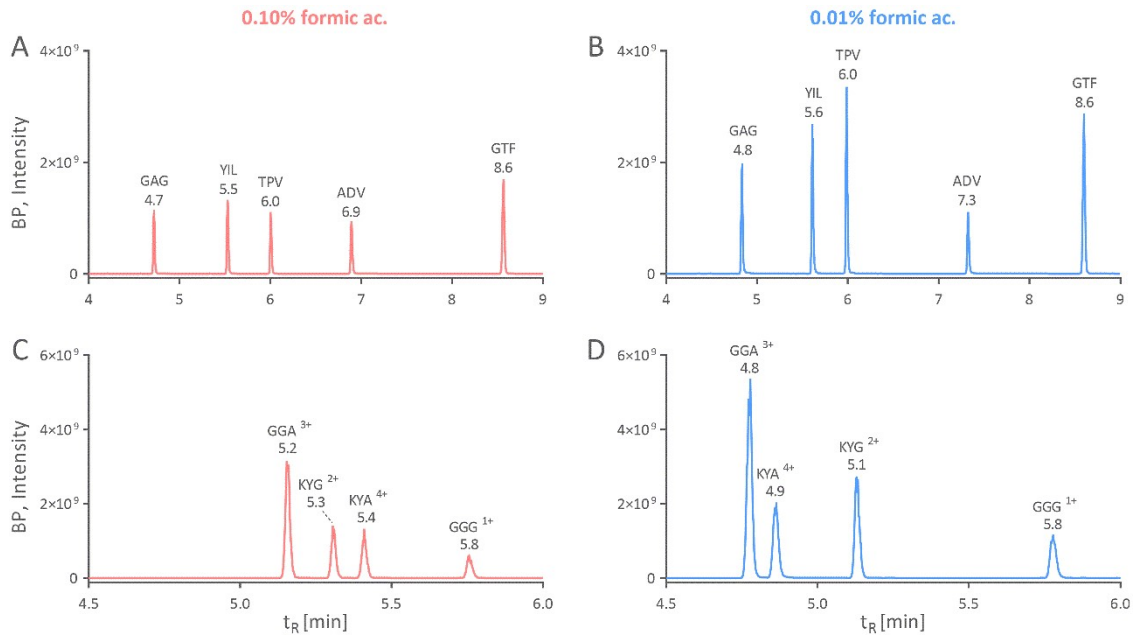

Figure S2. Intensity distribution for peptides identified from the tryptic digest of Jurkat cells exclusively in low formic acid concentration versus those identified in both conditions.

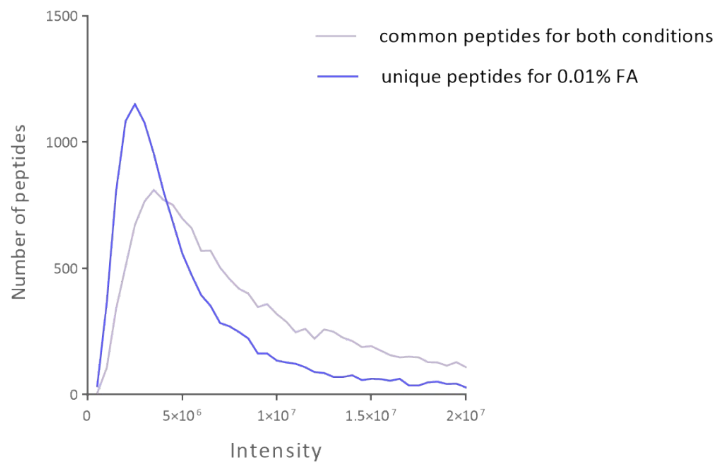



Figure S3. Percentage of peptides with artificial modifications identified against total identified peptides containing that particular amino acid when using 0.10% and 0.01% of formic acid as mobile phase acidifiers.

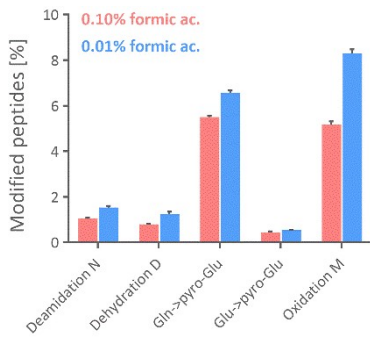

Supplement: d3an01508d1.pdf [file d3an01508d1.pdf]
